# Supplementary material for: Mosasauroid phylogeny under multiple phylogenetic methods provides new insights on the evolution of aquatic adaptations in the group
Source: PubMed Central journal article supplement (PMC5415187; doi:10.1371/journal.pone.0176773), 2017-05-03
Supplement: pone.0176773.s003.pdf [file pone.0176773.s003.pdf]

# Exp+GA

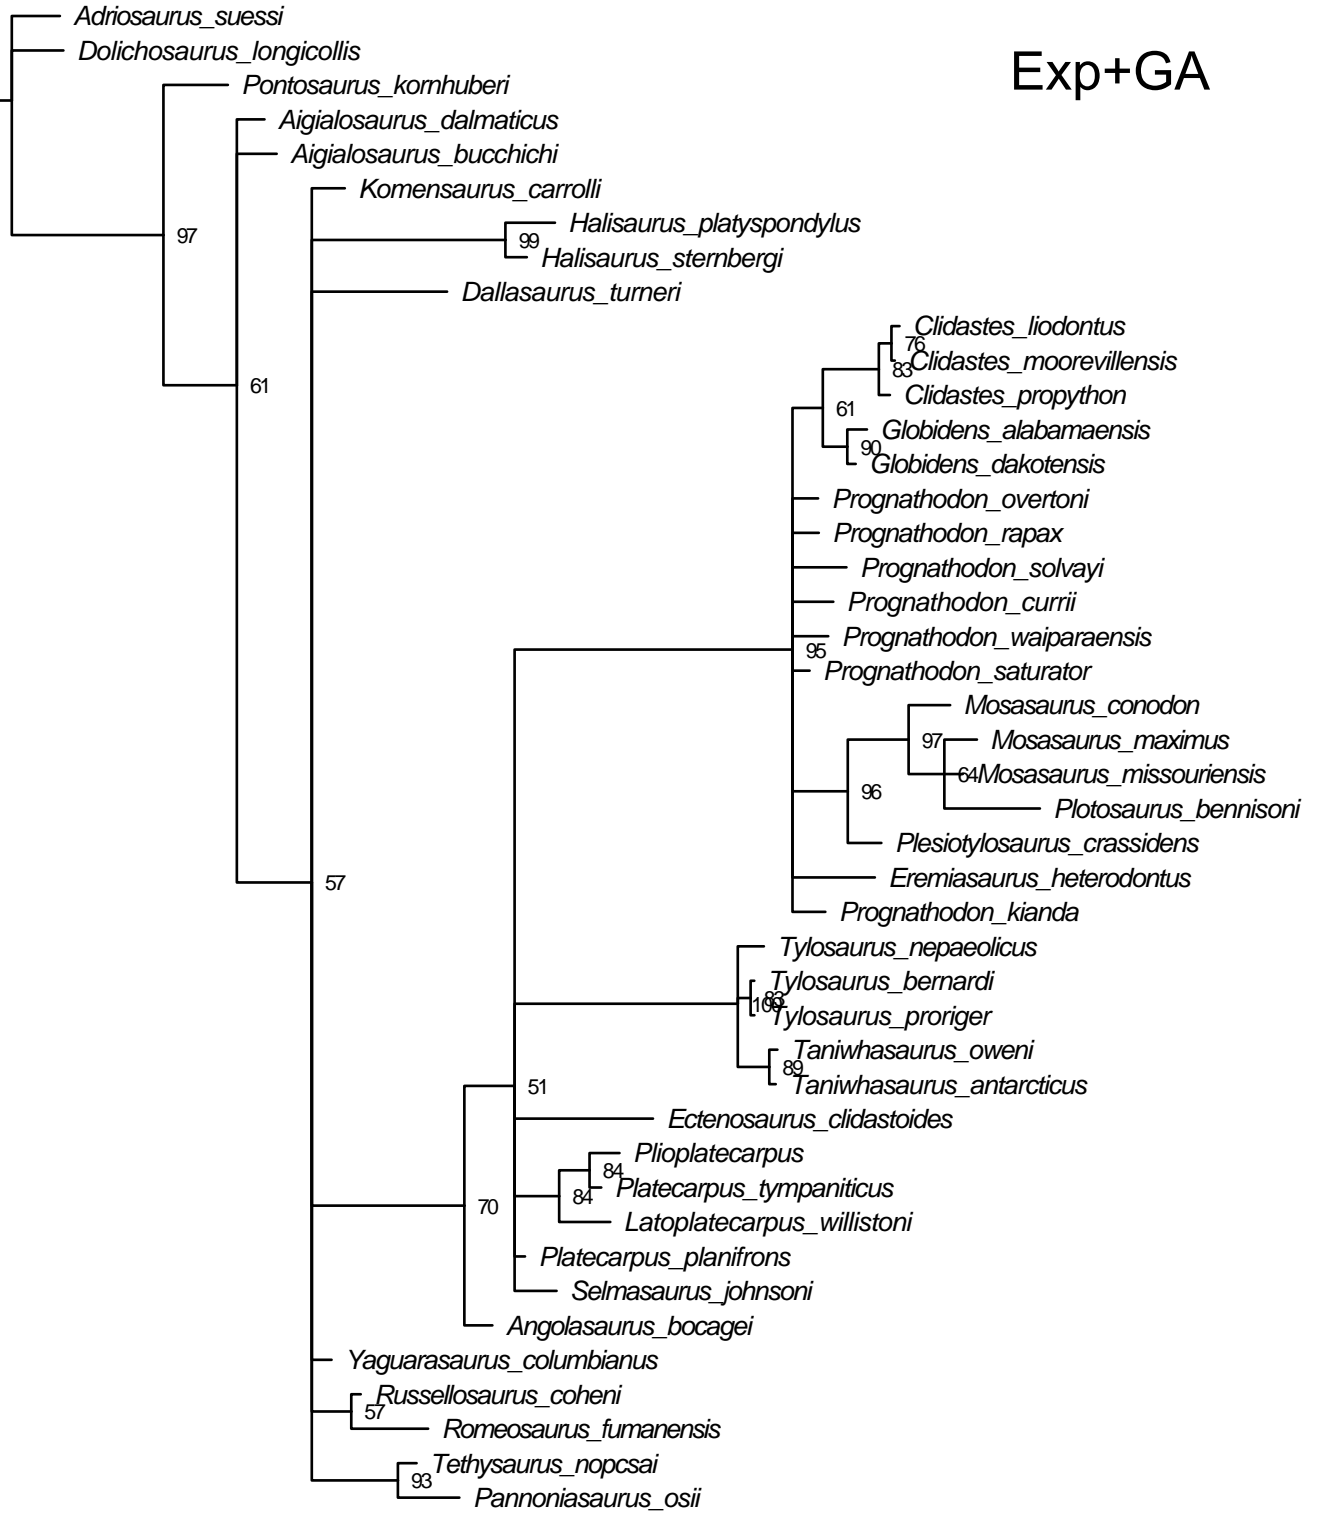

0.3

Exp+LN

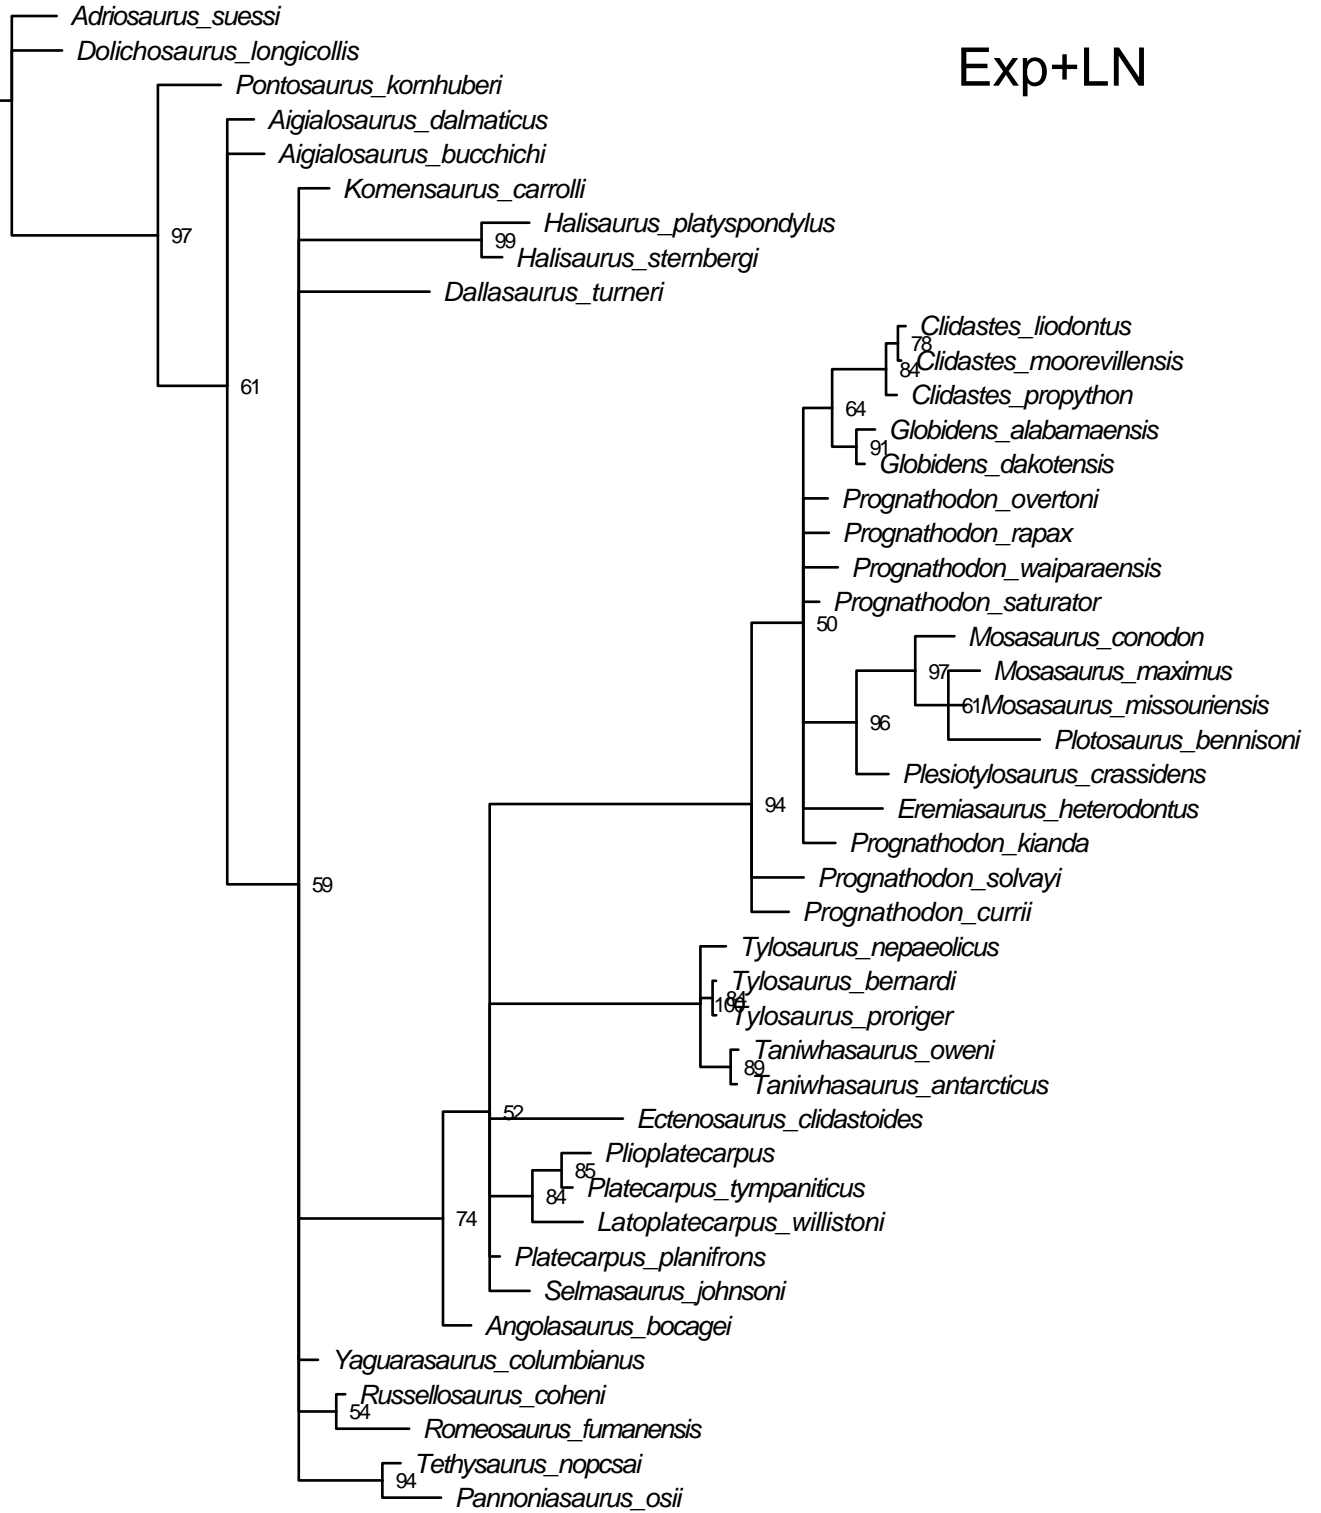

0.3

# Uni+GA

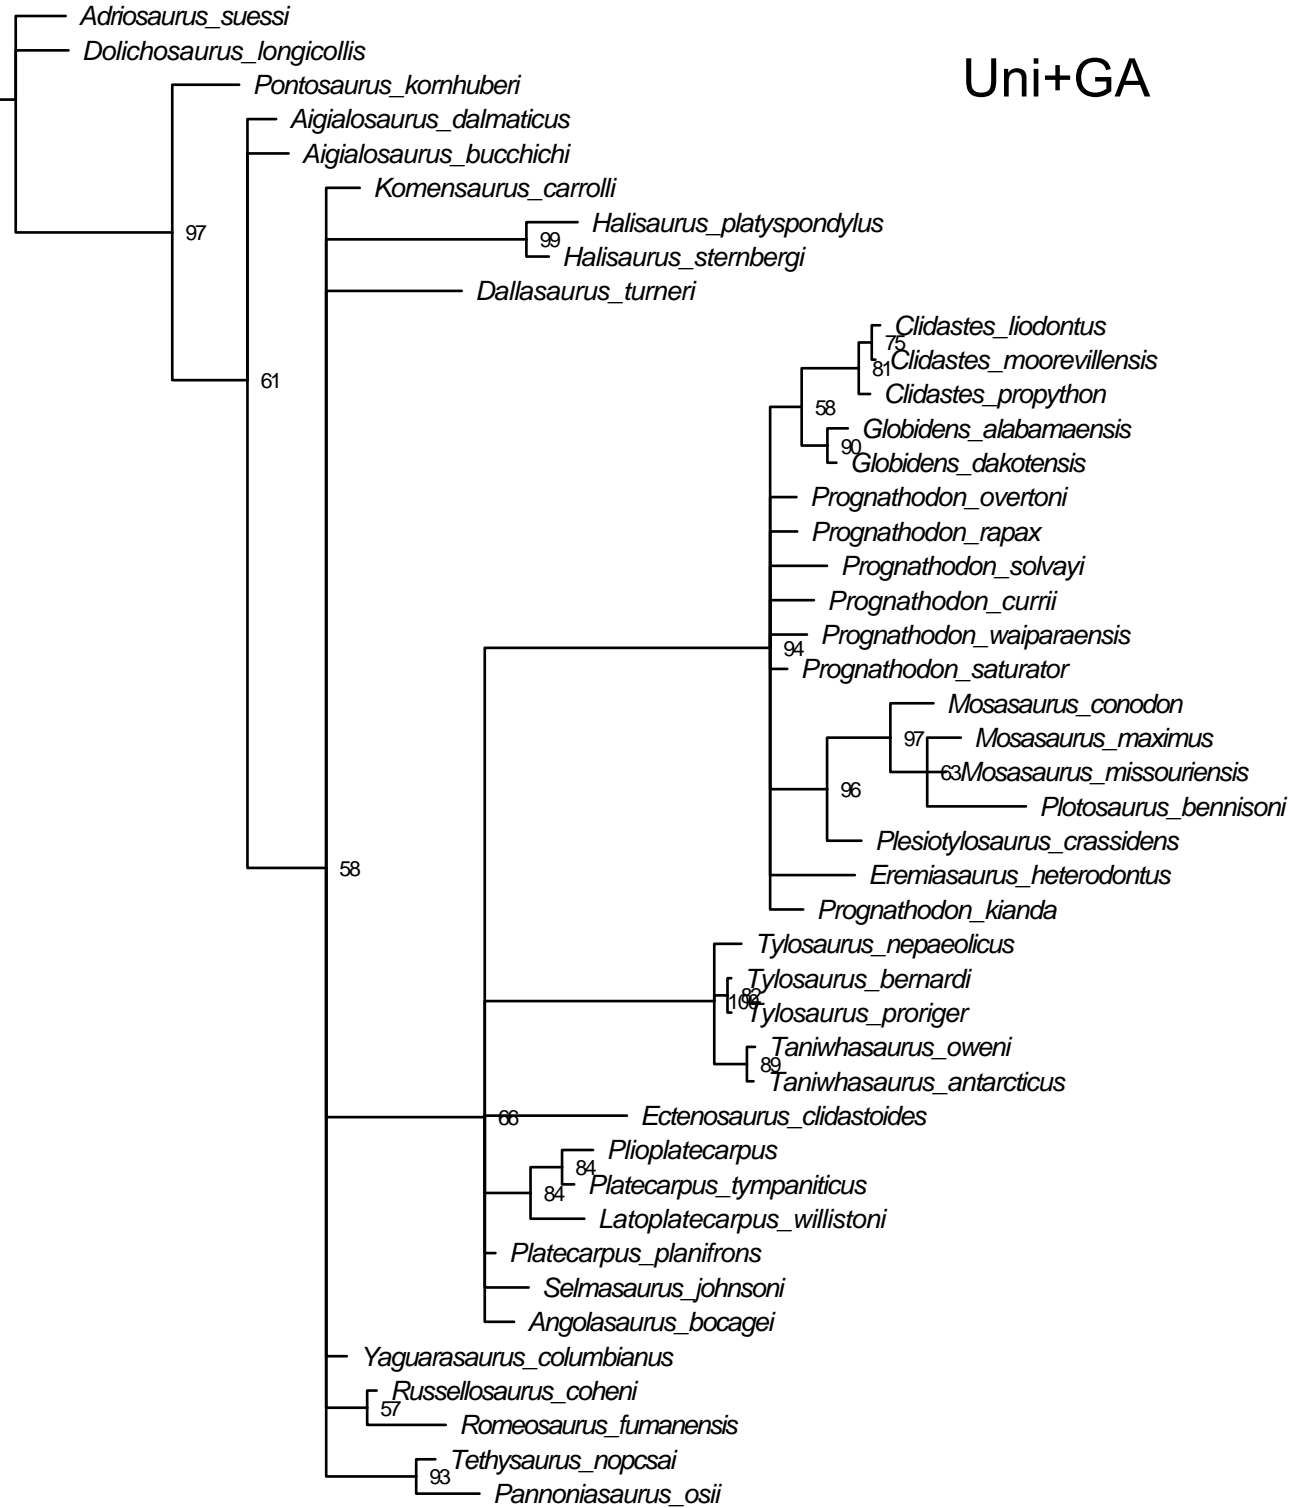

0.3

Uni+LN

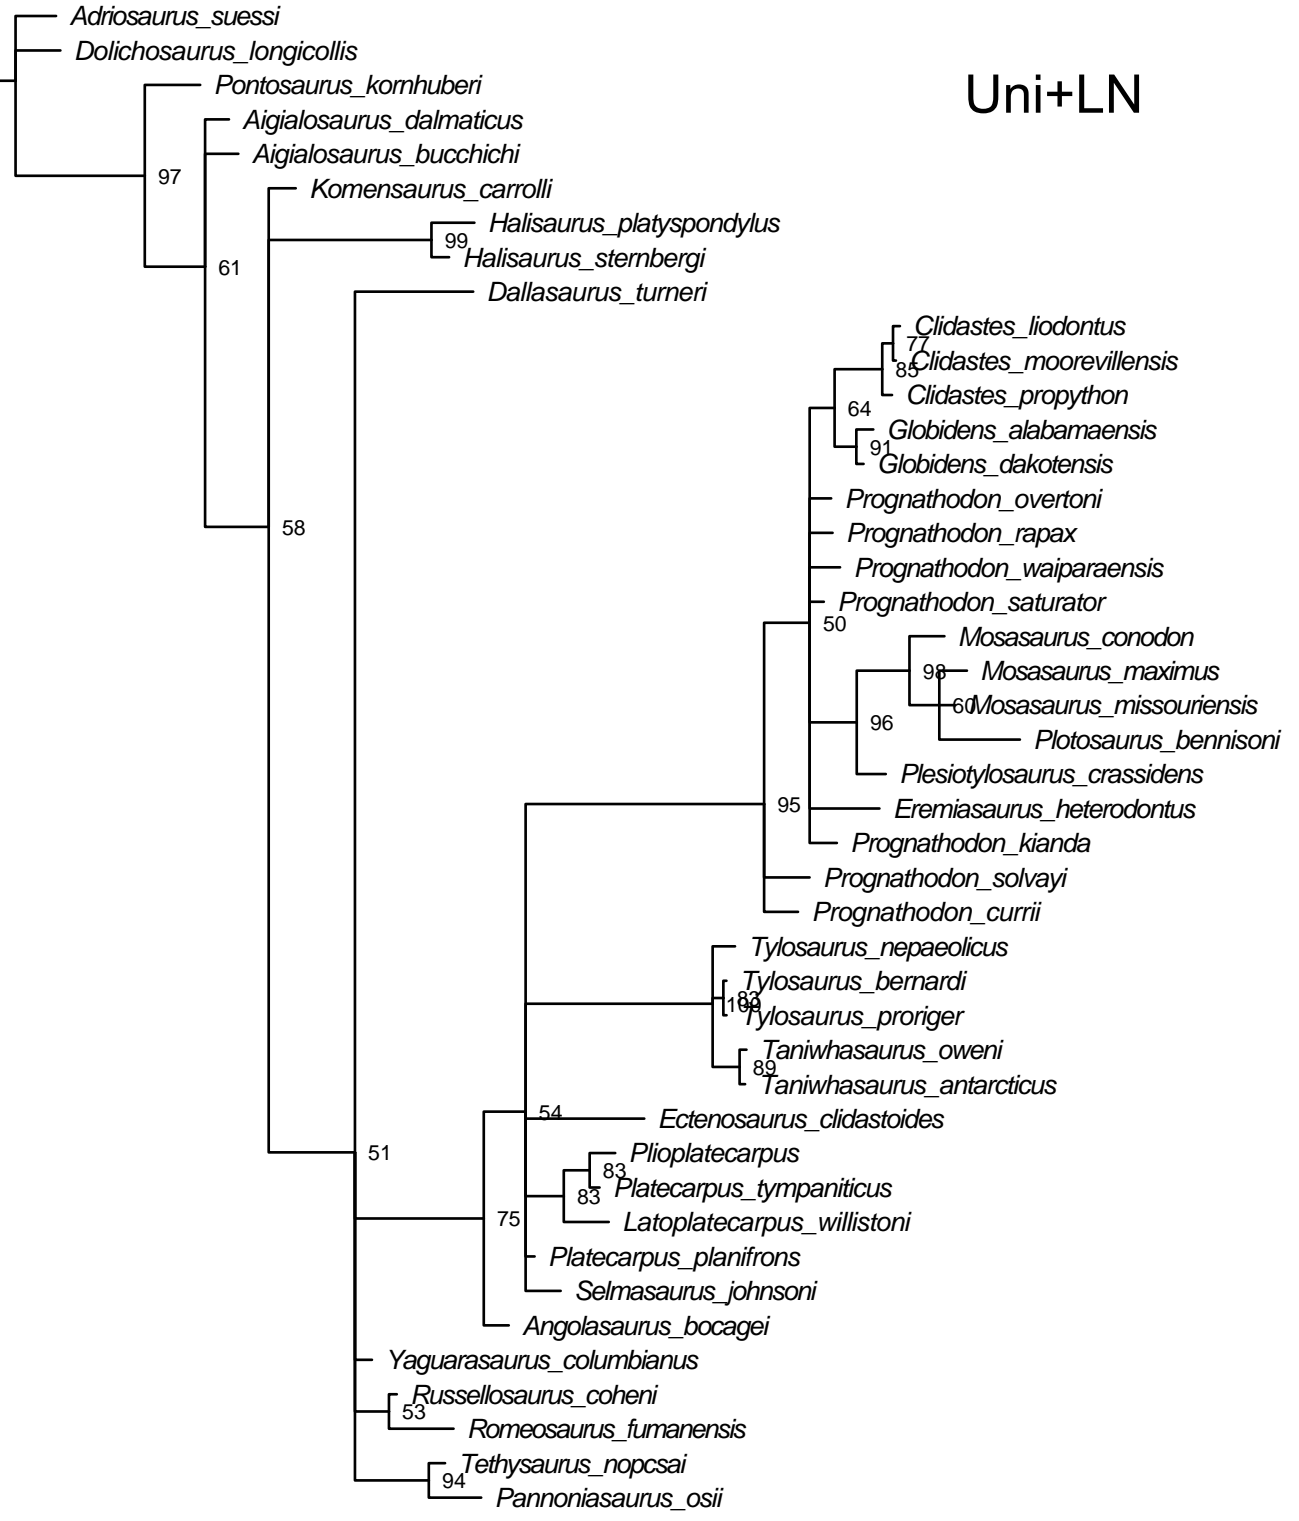

0.3
