# Supplementary material for: Mosasauroid phylogeny under multiple phylogenetic methods provides new insights on the evolution of aquatic adaptations in the group
Source: PubMed Central journal article supplement (PMC5415187; doi:10.1371/journal.pone.0176773), 2017-05-03
Supplement: pone.0176773.s004.pdf [file pone.0176773.s004.pdf]

# Co-UMP: Ch. 89

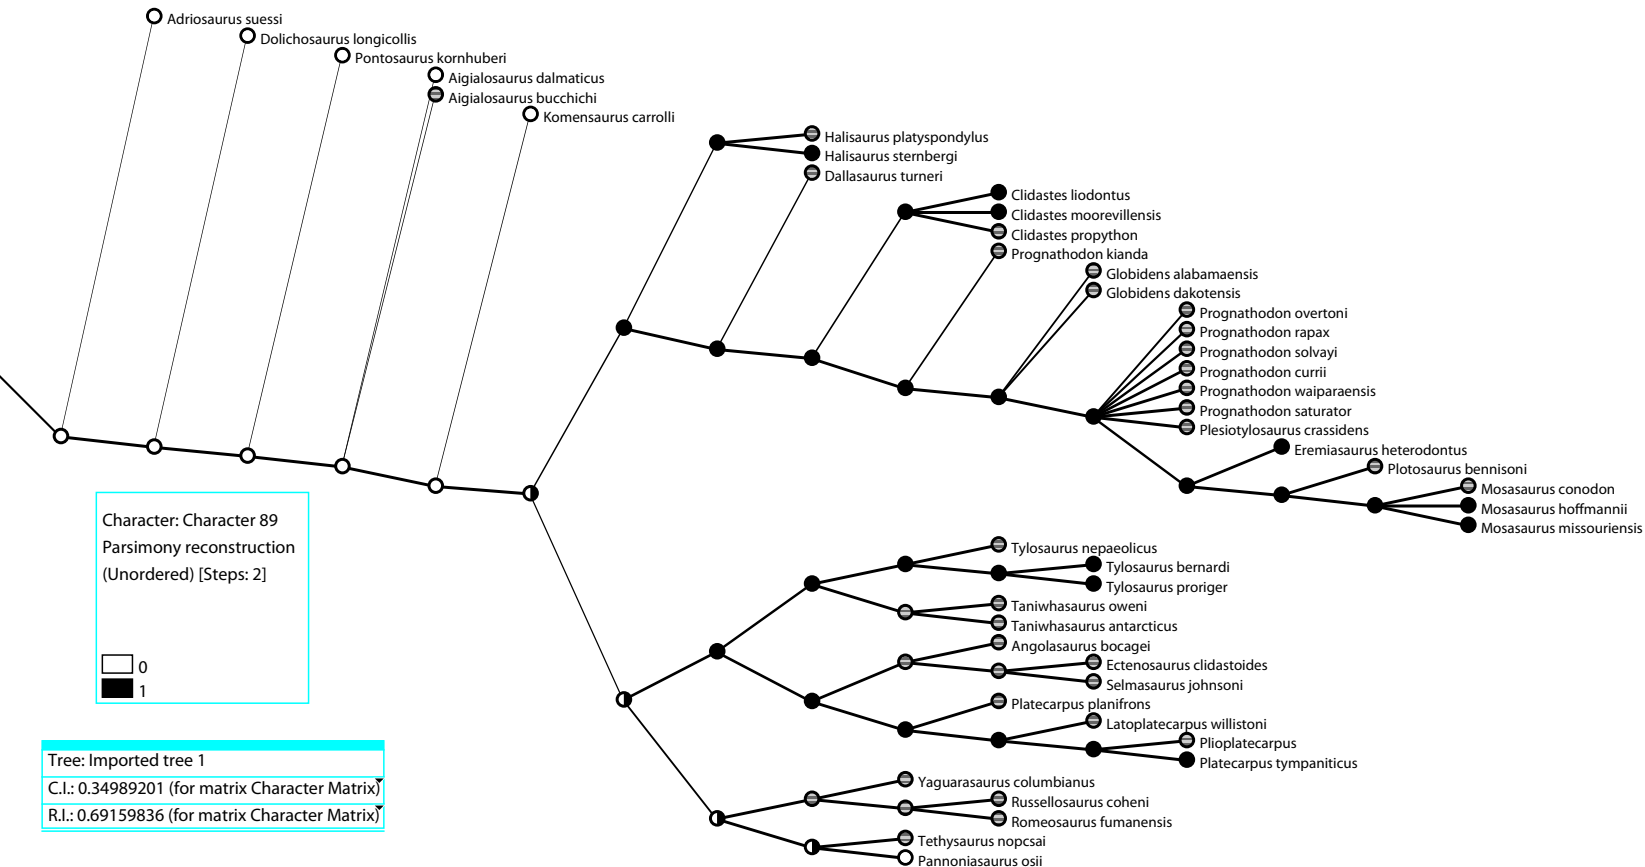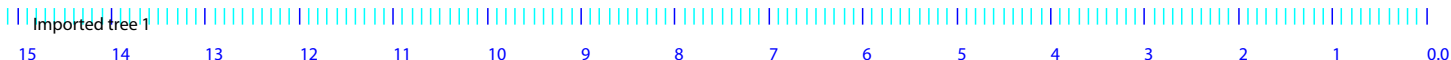

# Co-UMP: Ch. 117

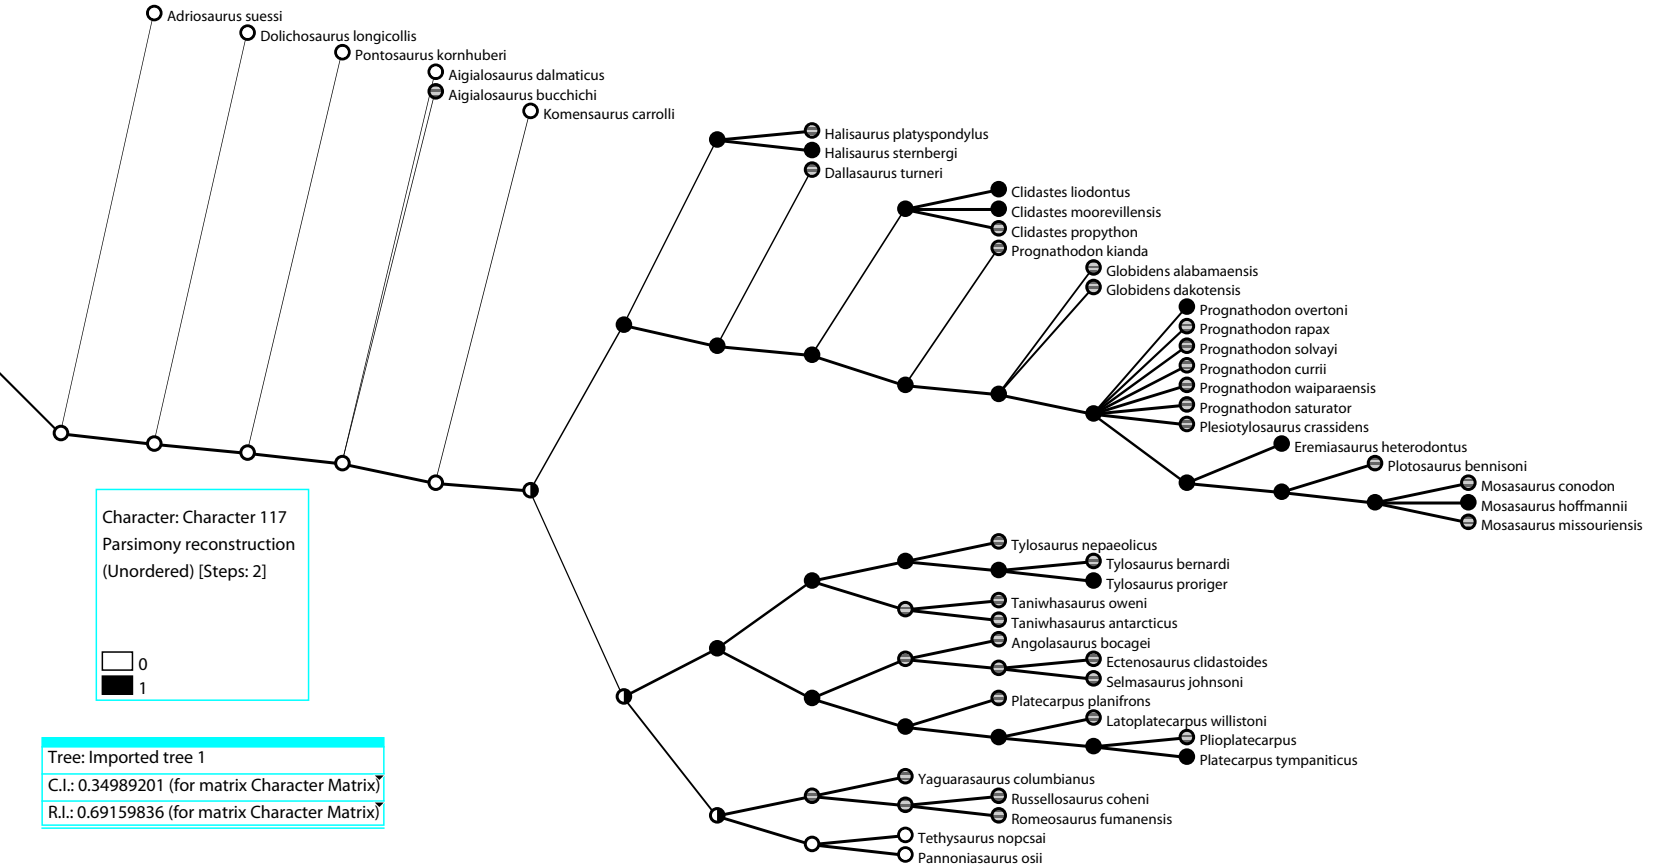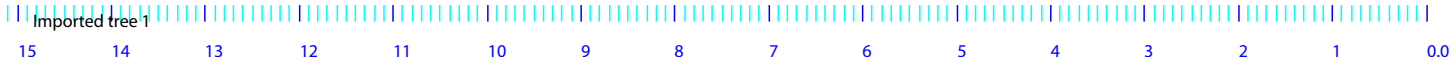

# Co-UMP: Ch. 123

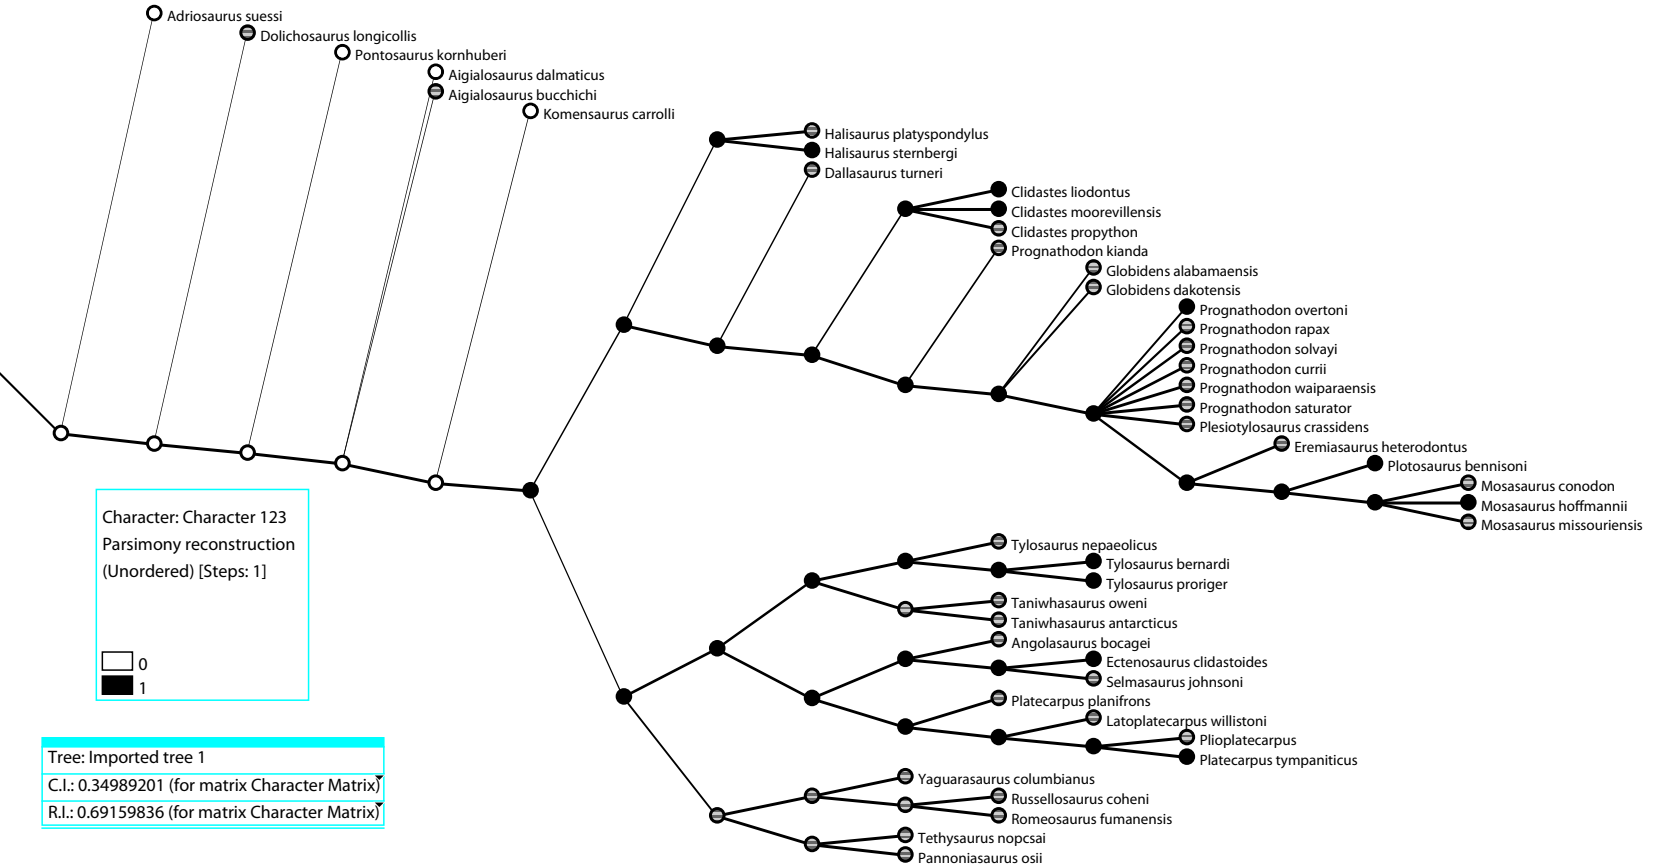

Tree: Imported tree 1  
 C.I.: 0.34989201 (for matrix Character Matrix)  
 R.I.: 0.69159836 (for matrix Character Matrix)

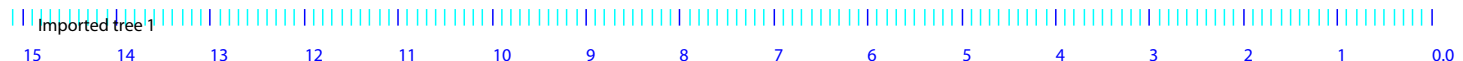

# Mu-UMP: Ch. 89

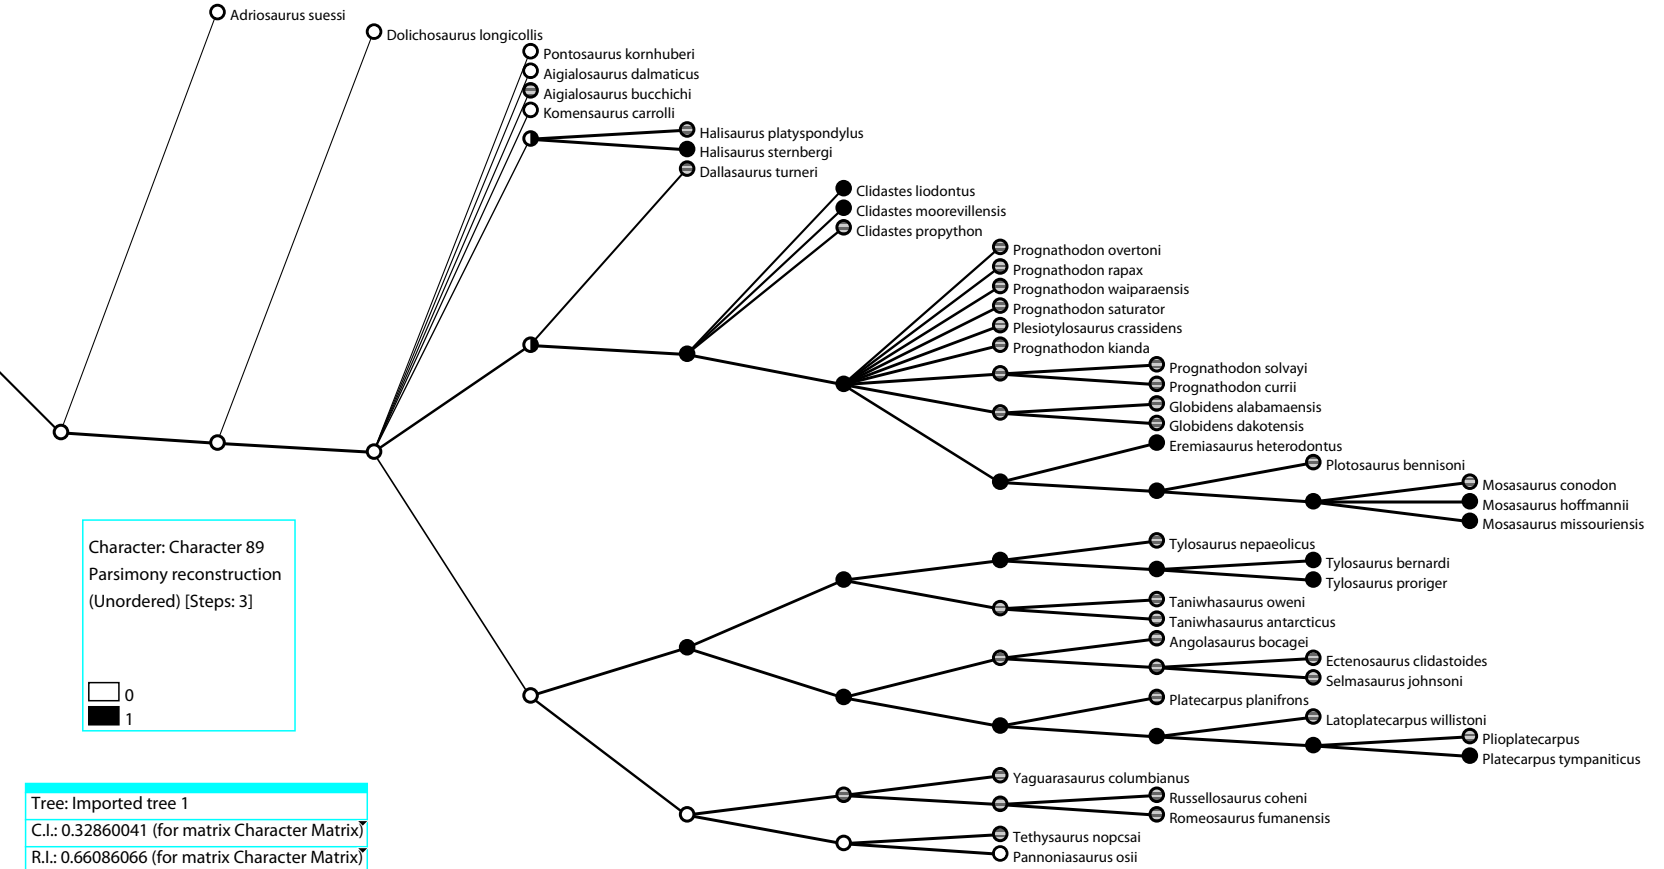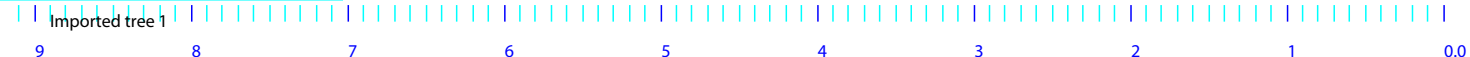

# Mu-UMP:Ch. 117

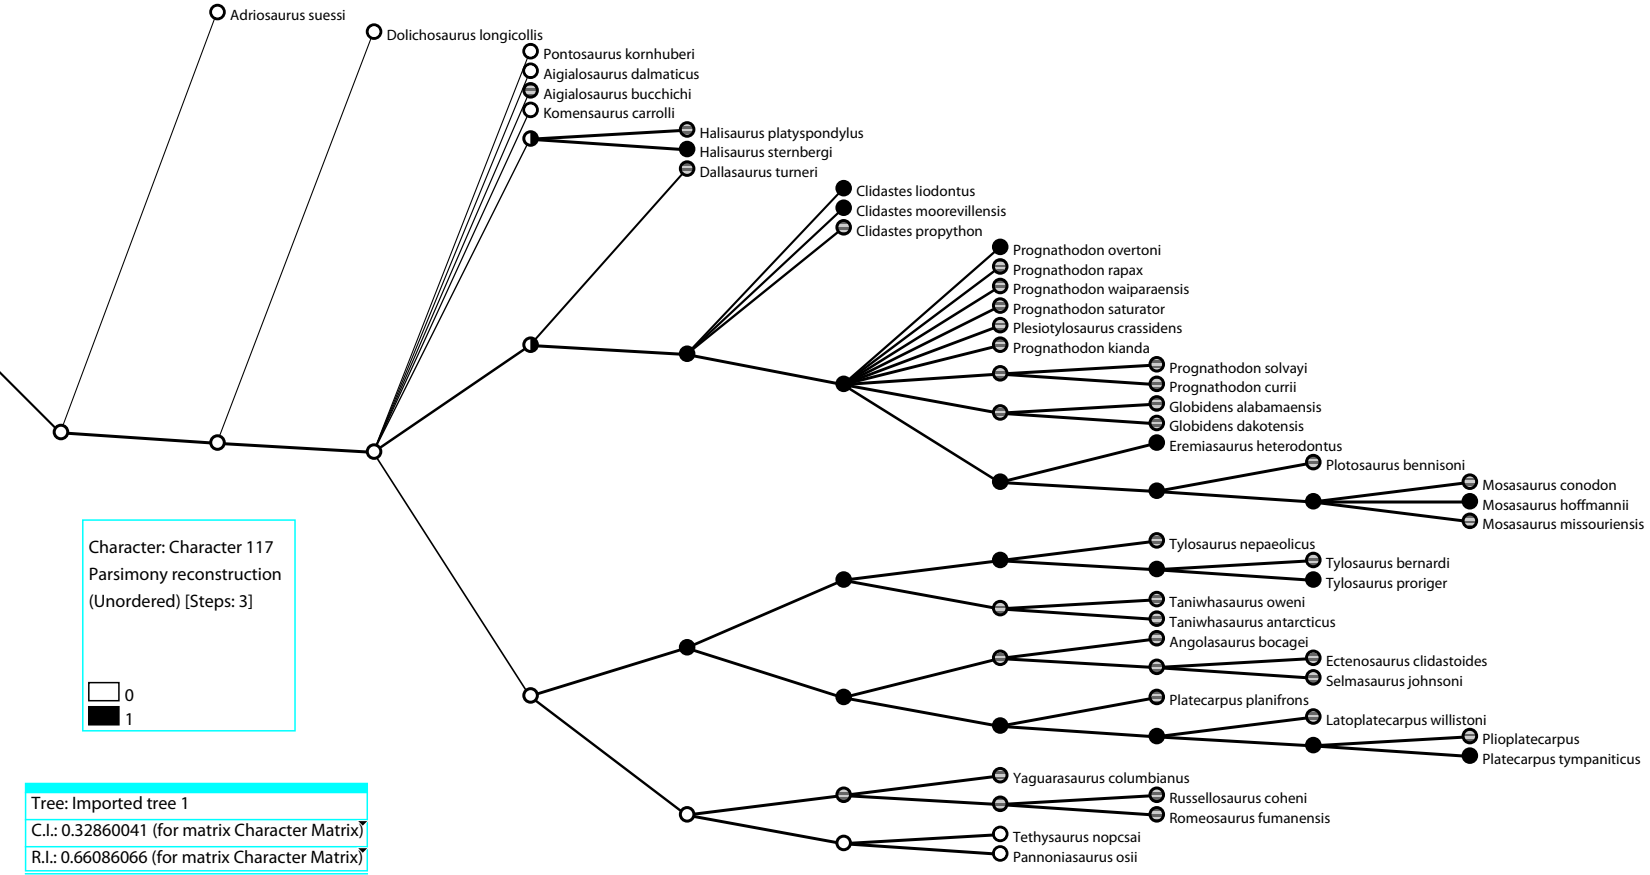

# Mu-UMP: Ch. 123

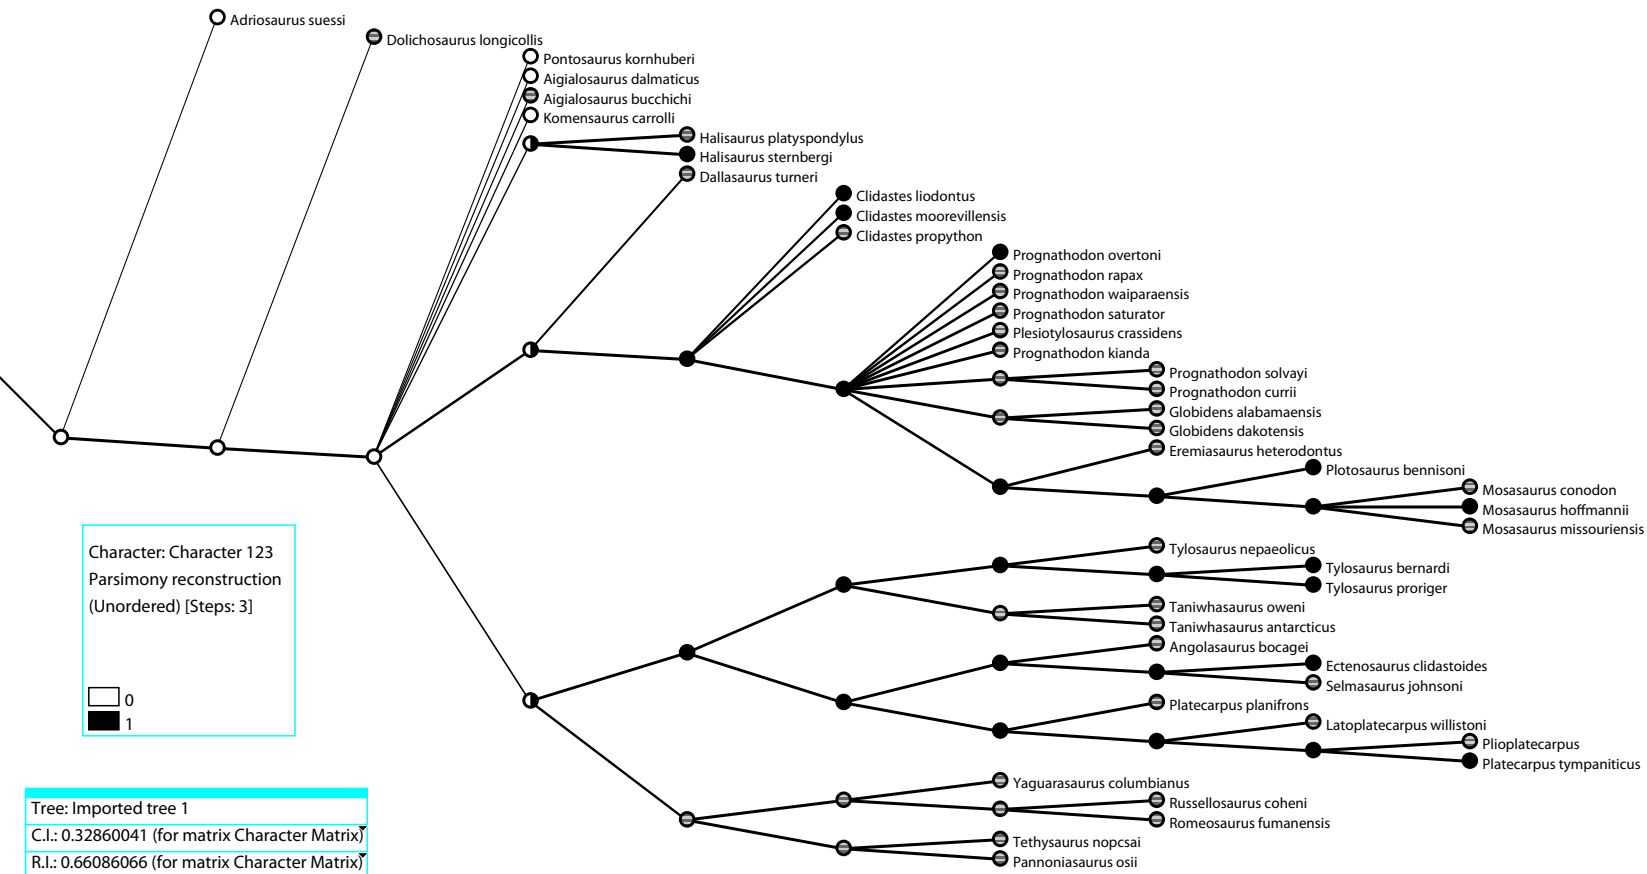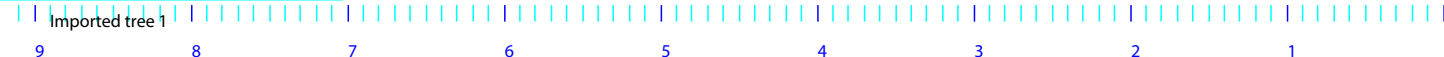

# IWMP: Ch. 89

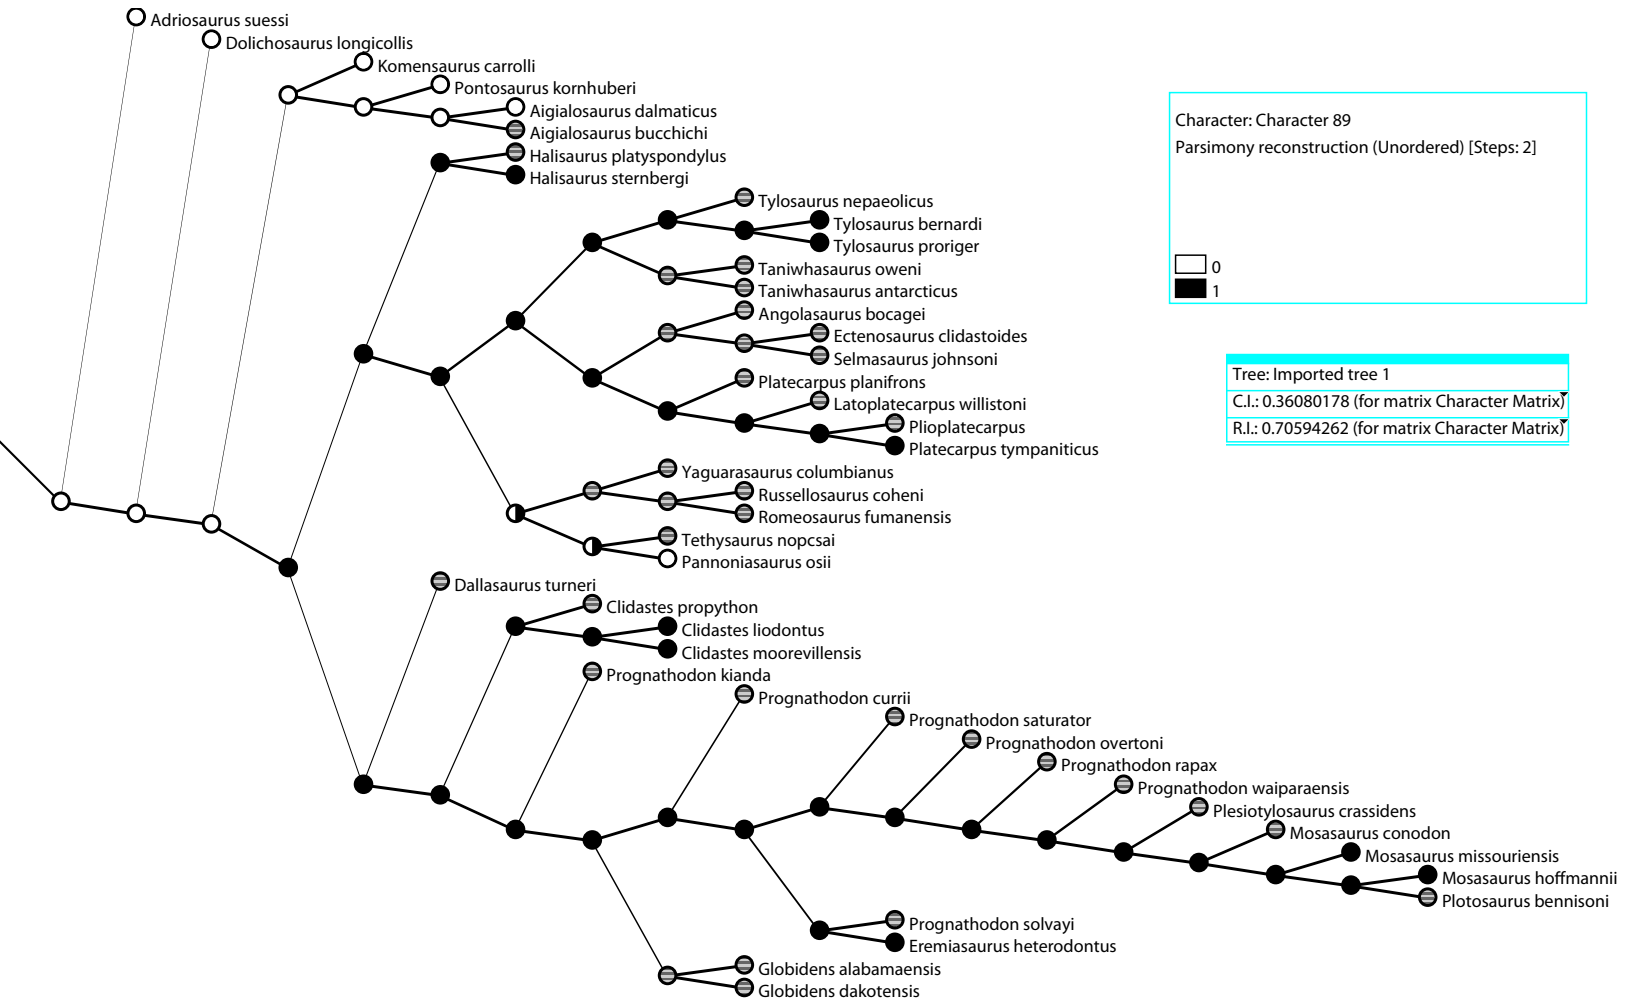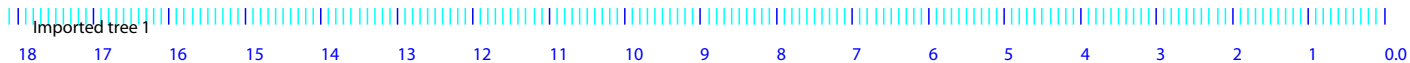

# IWMP: Ch. 117

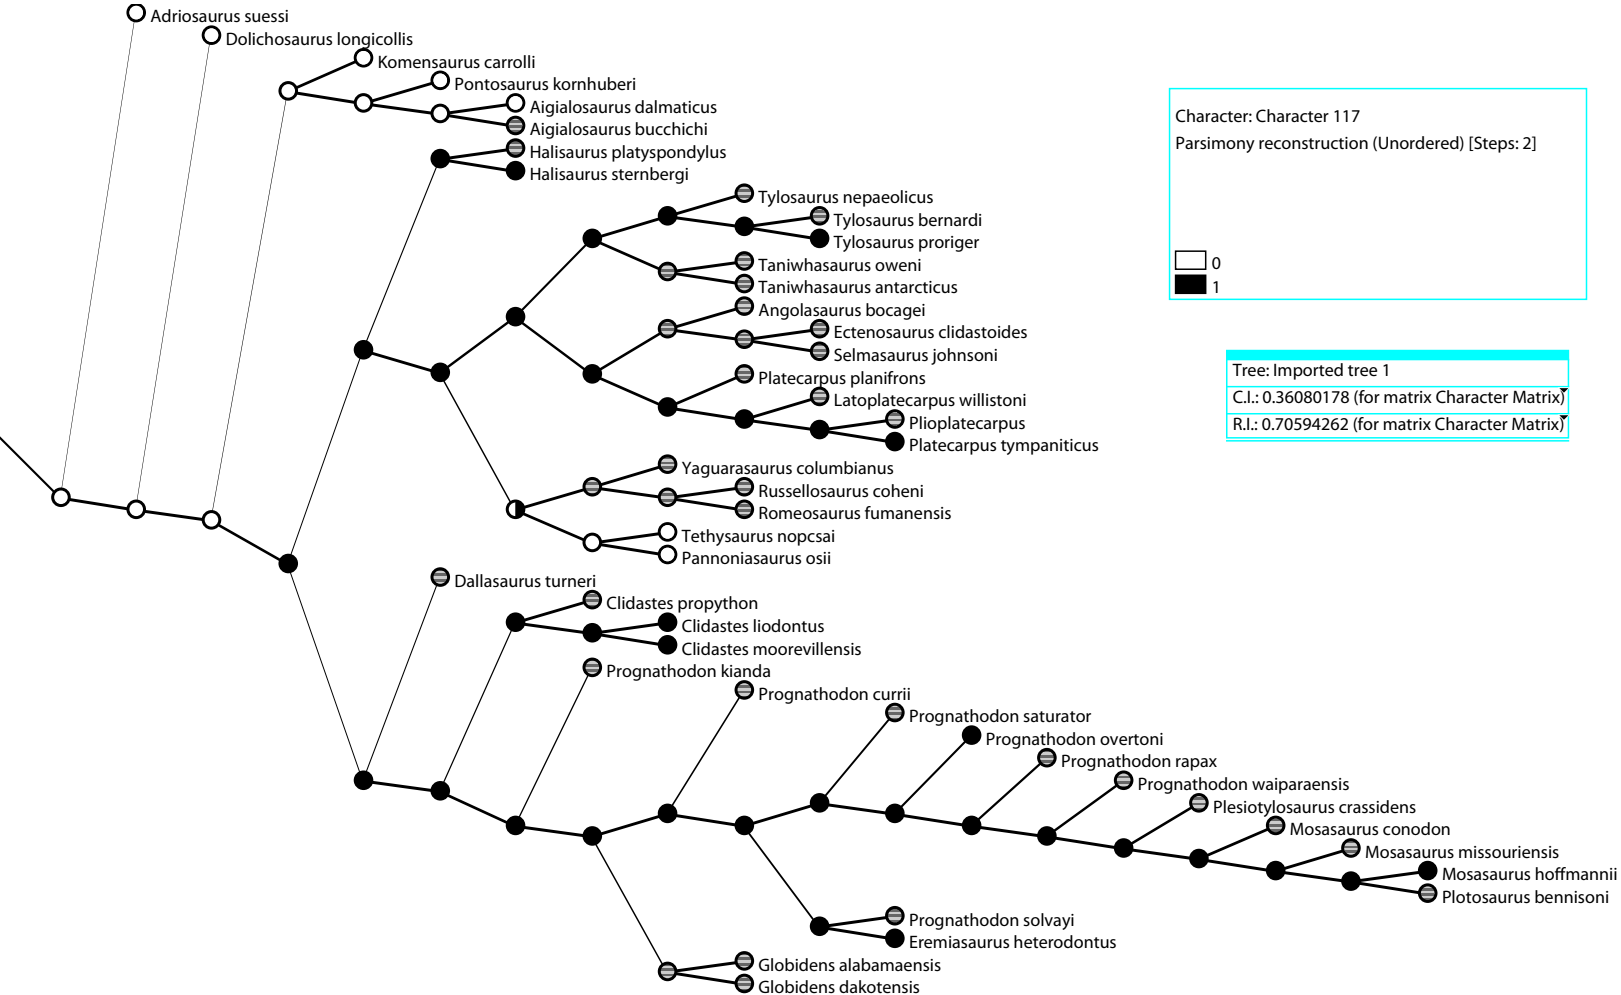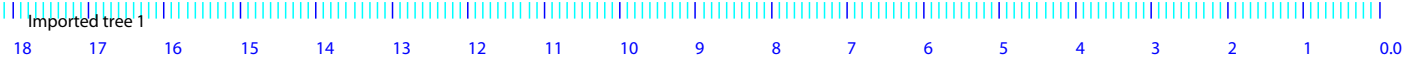



# IWMP: Ch. 123

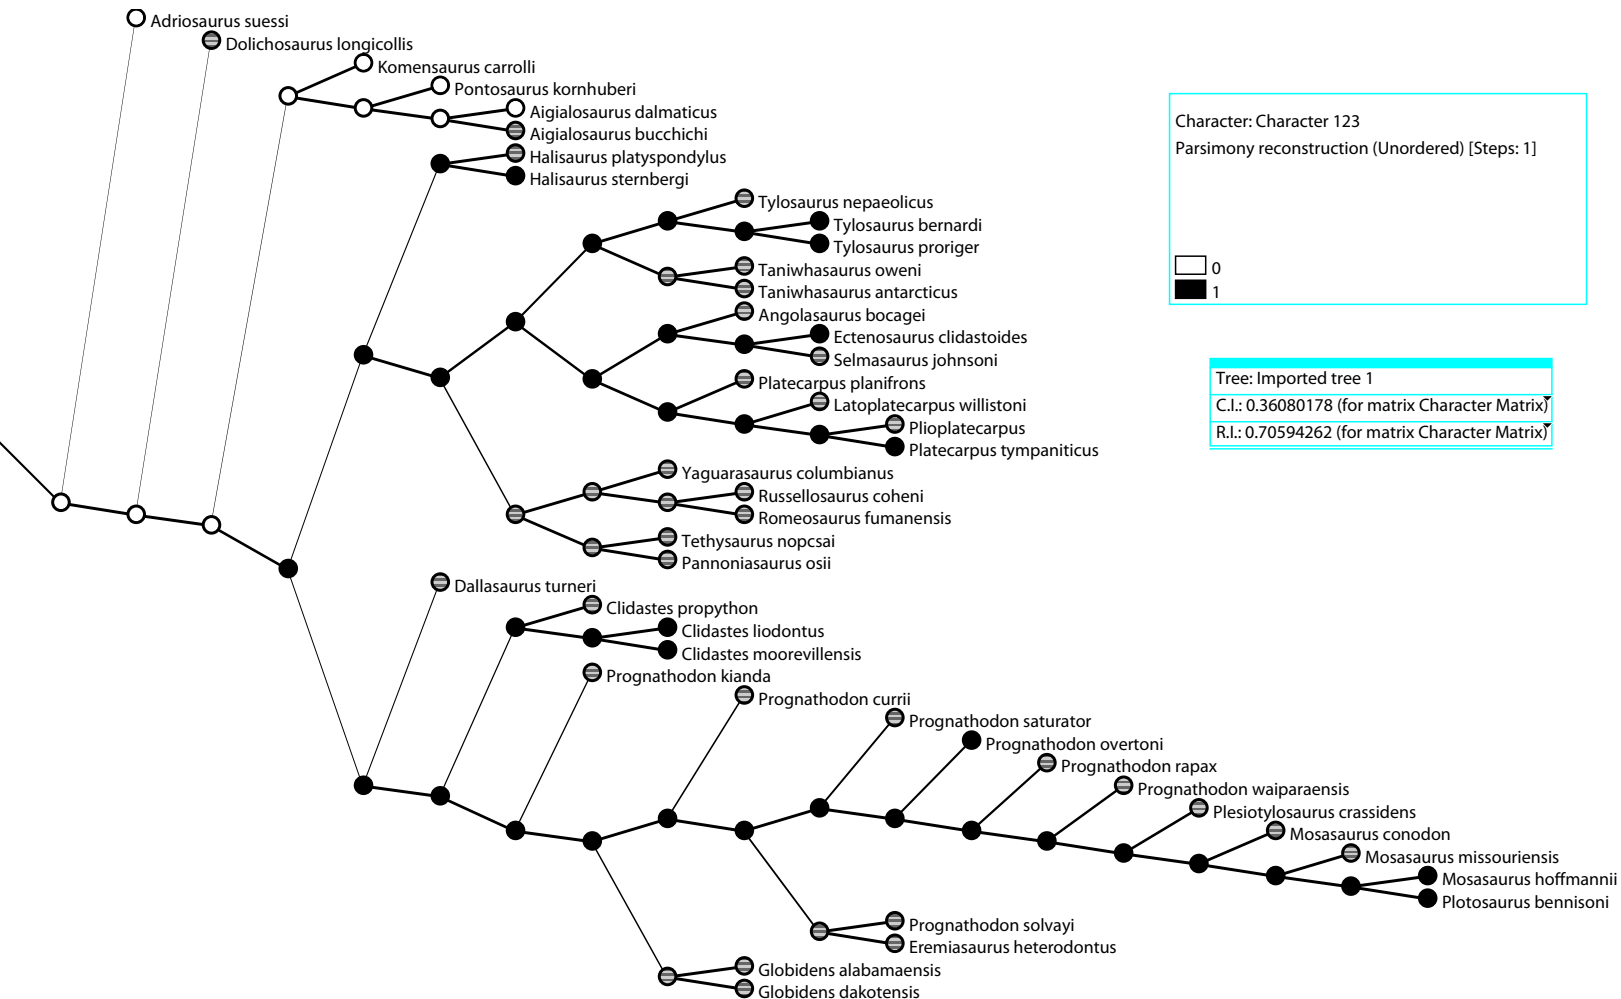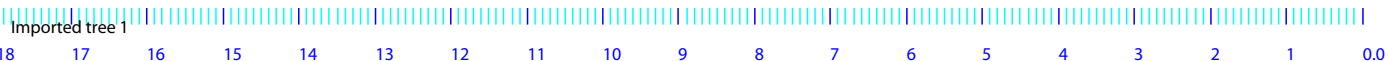

# ML: Ch. 89

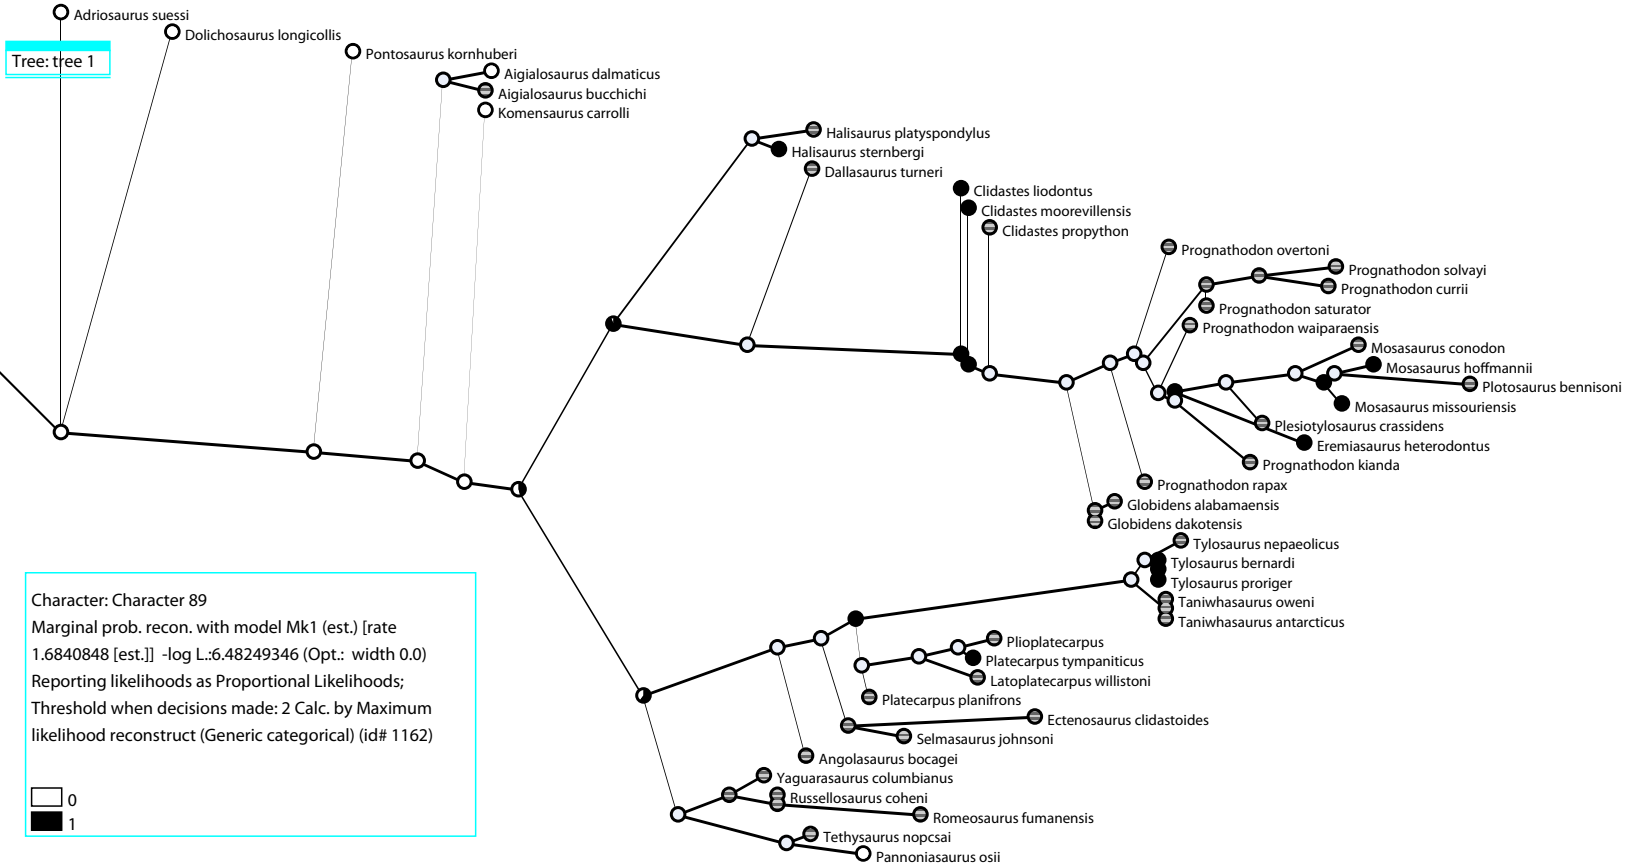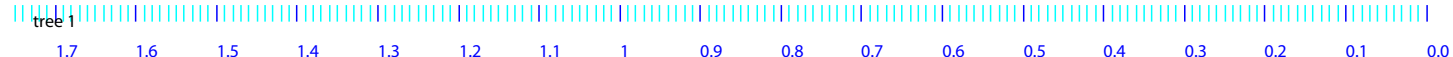

# ML: Ch. 117

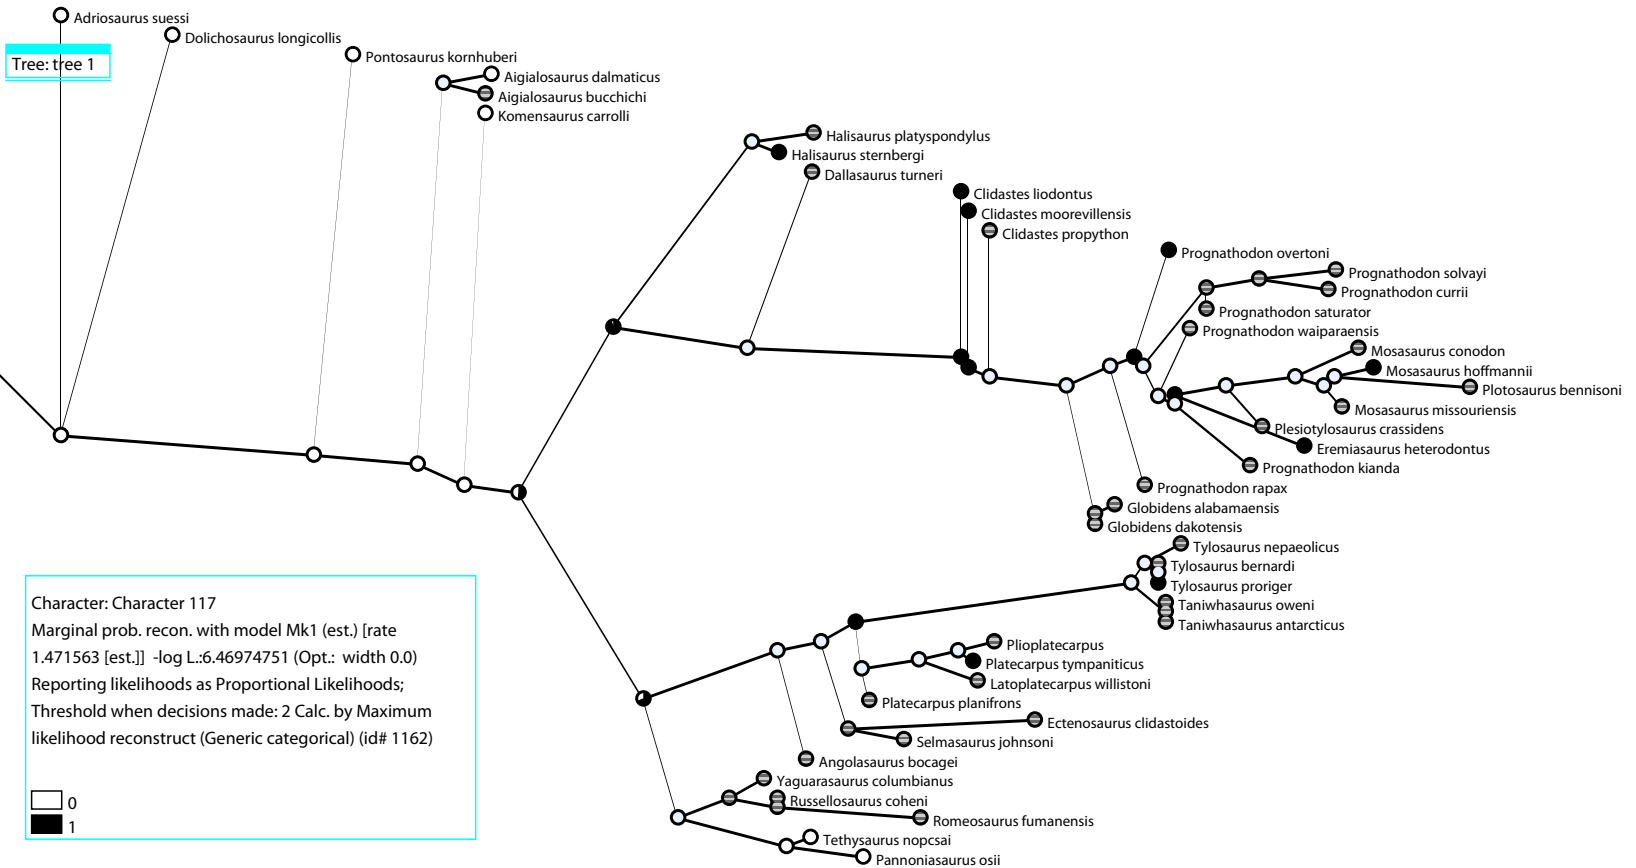

# ML:Ch. 123

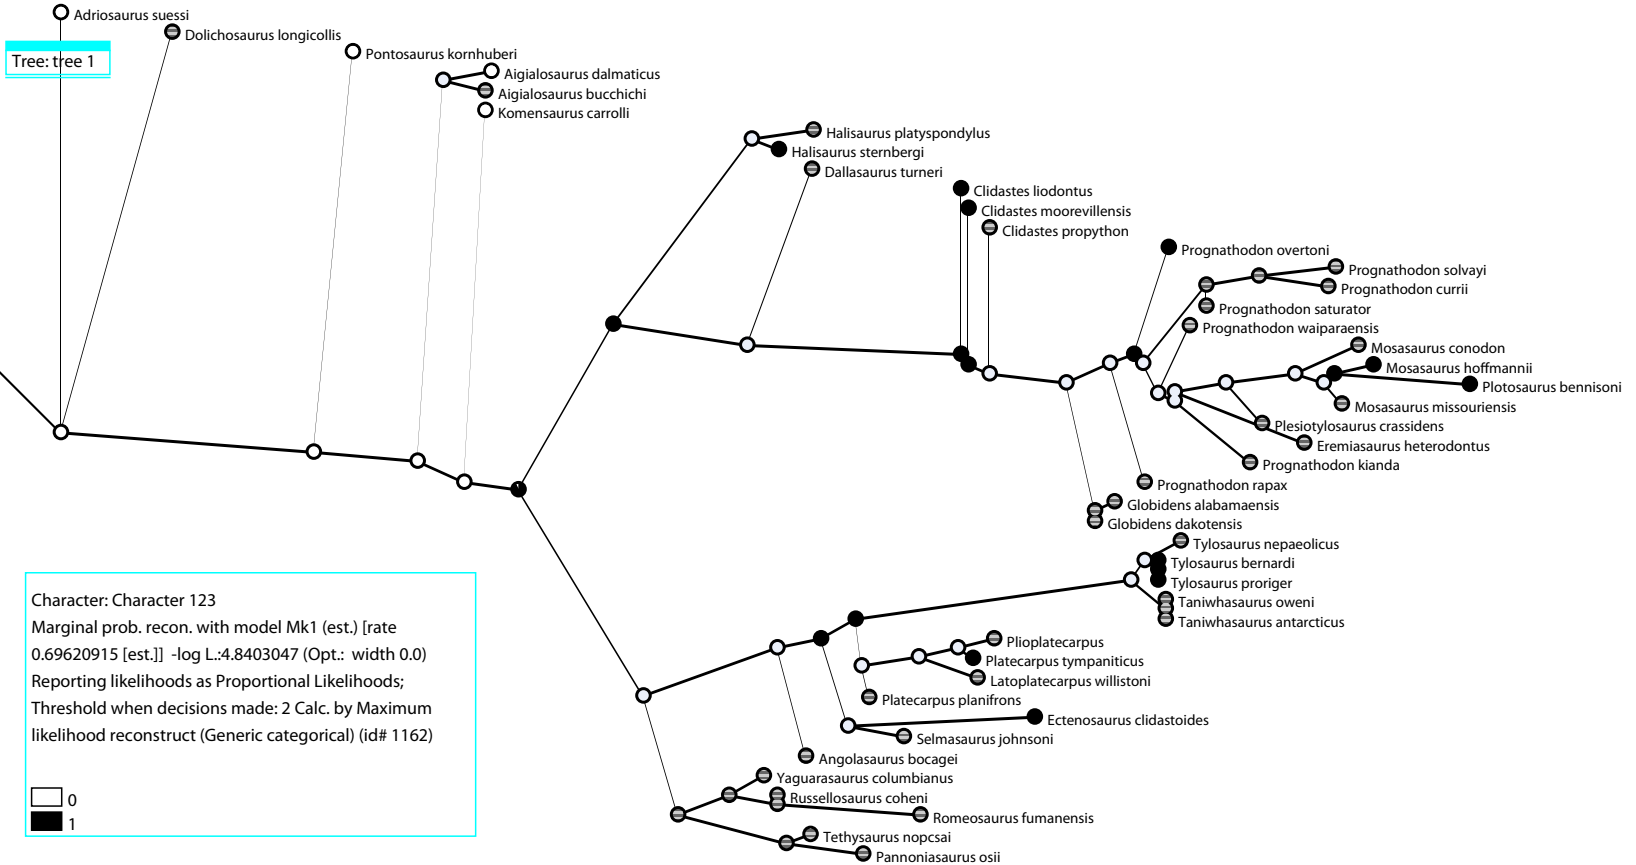

# BI-MaxCladeCred: Ch.89

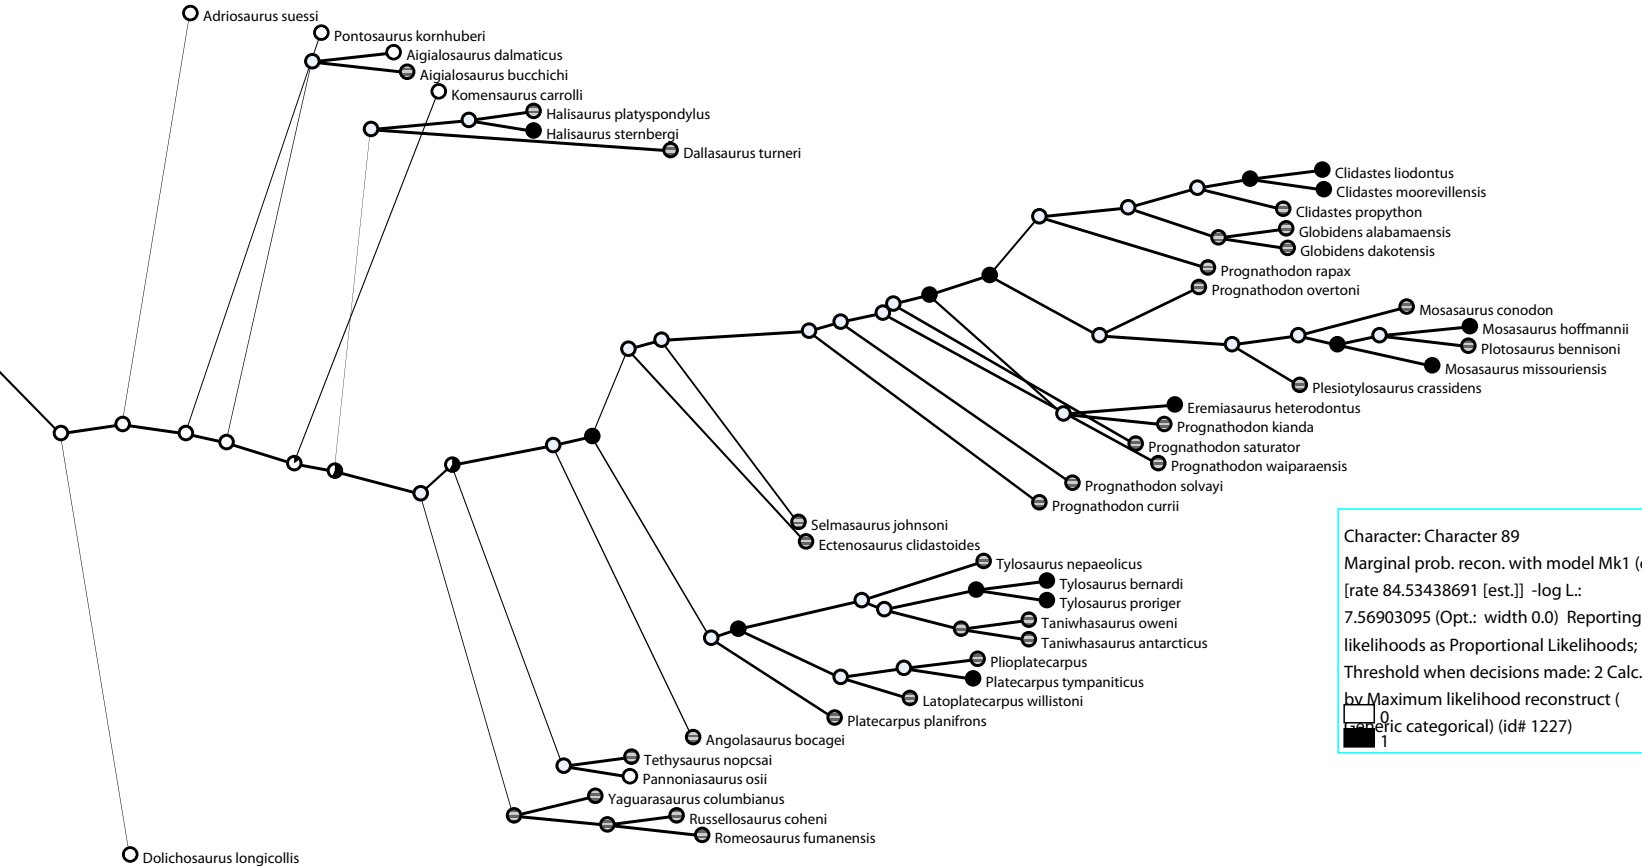

Character: Character 89  
Marginal prob. recon. with model Mk1 (est.)  
[rate 84.53438691 [est.]] -log L:  
7.56903095 (Opt.: width 0.0) Reporting  
likelihoods as Proportional Likelihoods;  
Threshold when decisions made: 2 Calc.  
by Maximum likelihood reconstruct ( )  
generic categorical) (id# 1227)

# BI-MaxCladeCred: Ch.117

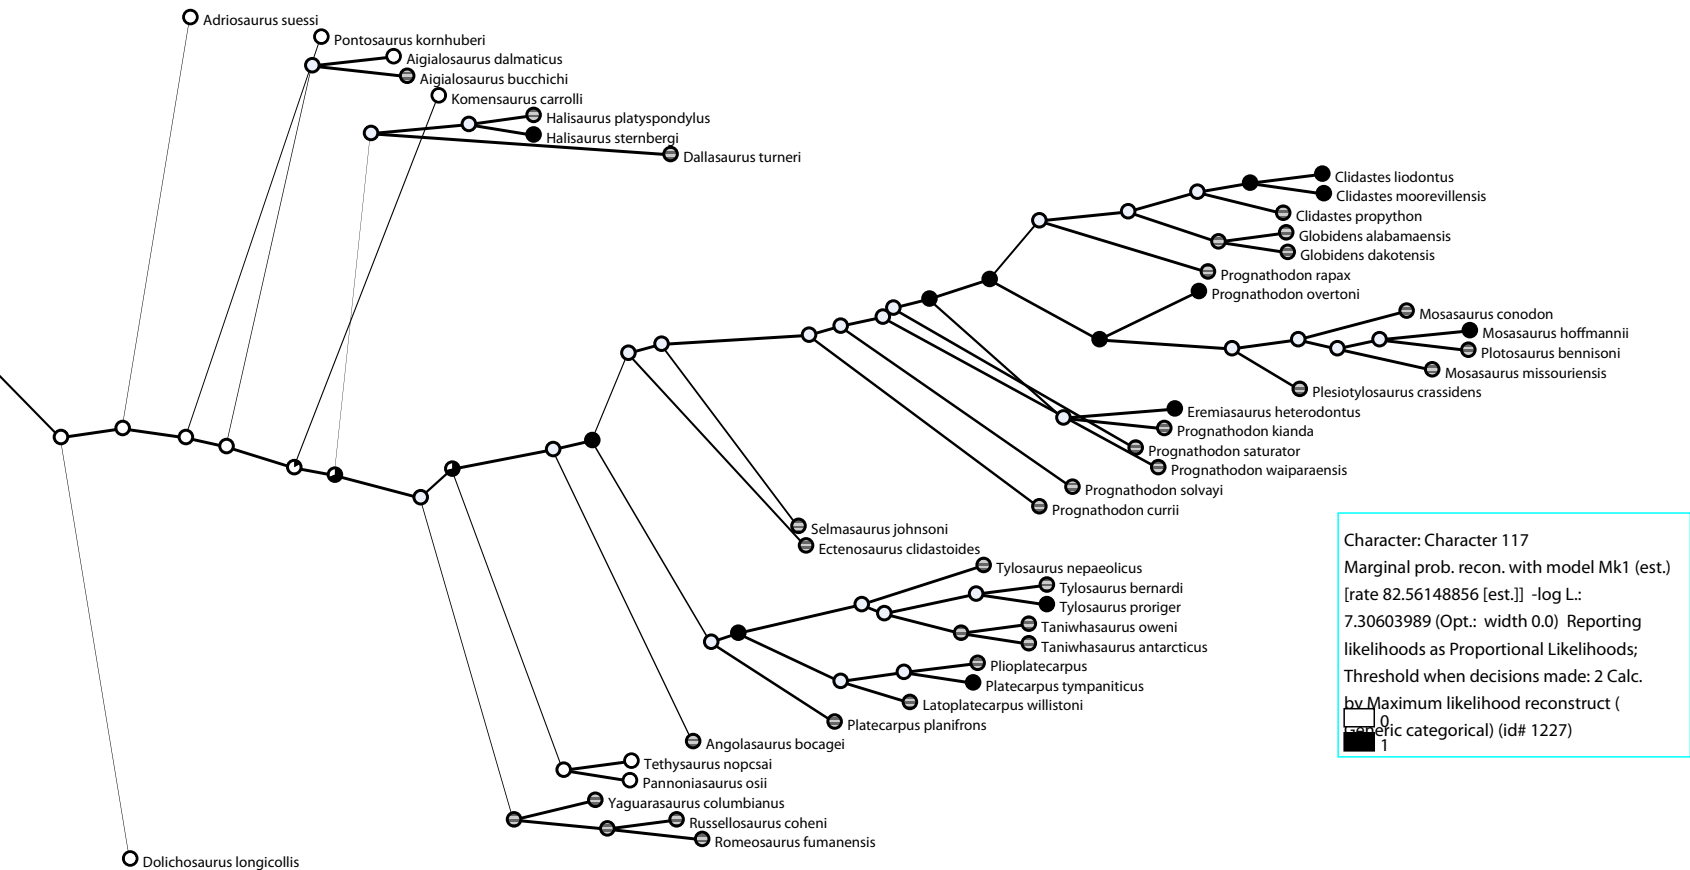

# BI-MaxCladeCred: Ch.123

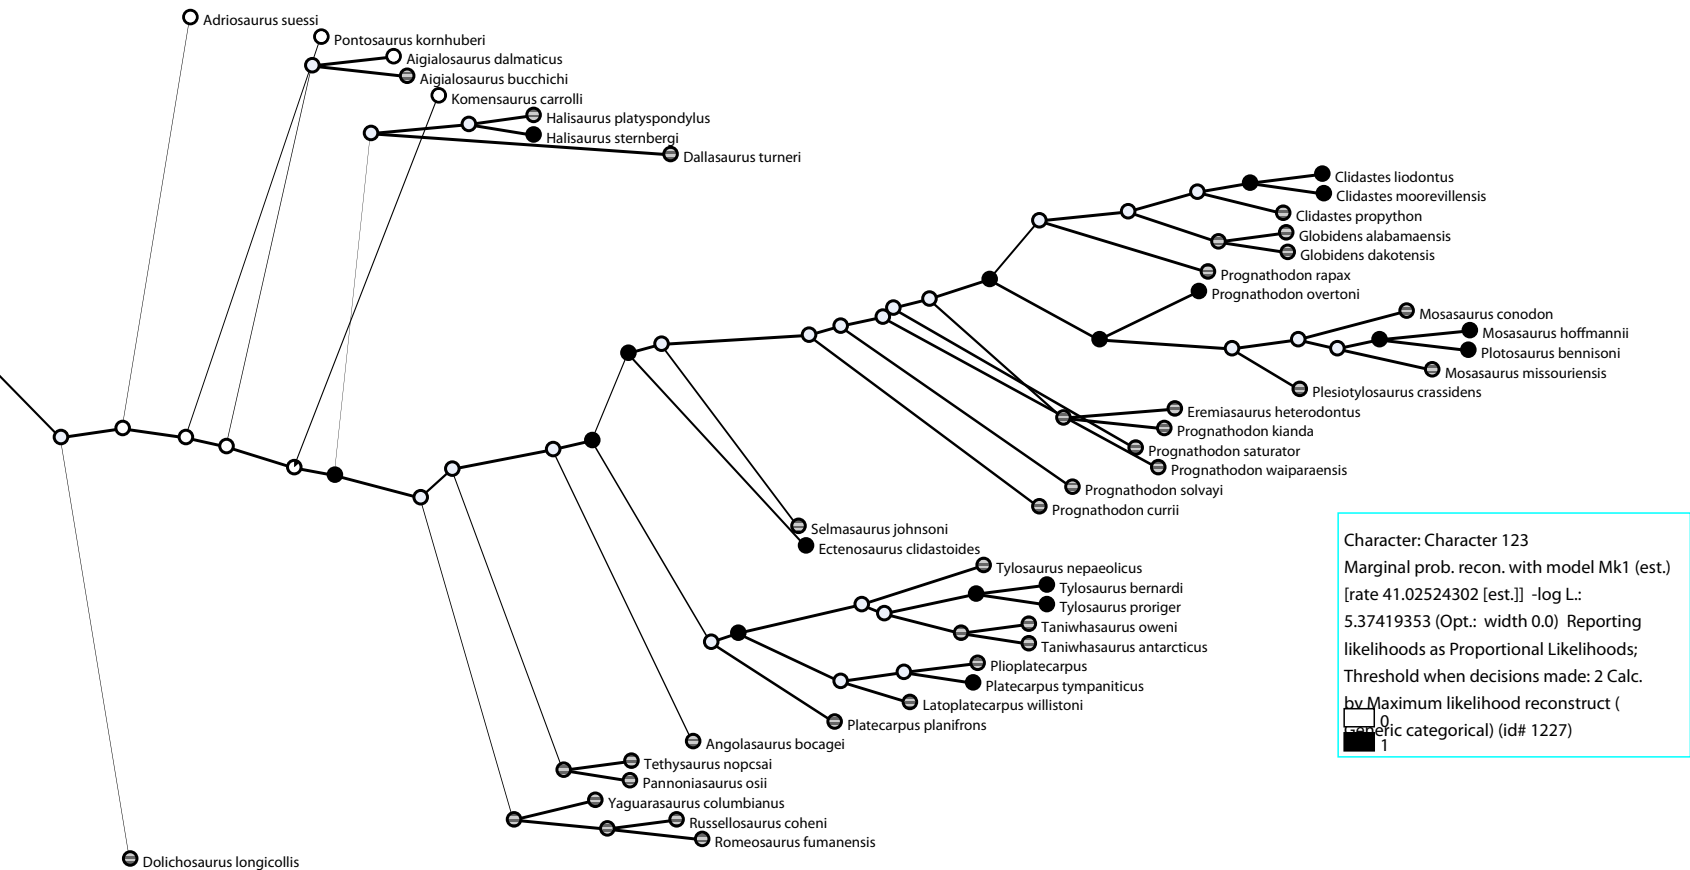

Edited, based on TREE1

0.02

0.01

0.0
